# Supplementary material
Source: PubMed Central journal article supplement (PMC4731021)
Supplement: supp_ddv494_ddv494supp_table1.pdf [file supp_ddv494_ddv494supp_table1.pdf]

Supplementary Table 1 Study populations for GWAS meta-analysis and replication genotyping

| Phase              | Type                              | Study center                 | Cases         | Controls      | Total         |
|--------------------|-----------------------------------|------------------------------|---------------|---------------|---------------|
| Discovery          | Illumina HumanHap660W and/or 610  | FLCCA, NCI                   | 5457          | 4493          | 9950          |
|                    | Illumina HumanOmni1 and/or OmniEx | NCC, Japan                   | 777           | 1,003         | 1780          |
|                    | Illumina HumanHap610              | Univ of Tokyo, Japan         | 356           | 457           | 813           |
|                    | Affymetrix 6.0                    | Nanjing, China               | 287           | 324           | 611           |
| <b>Subtotal</b>    |                                   |                              | <b>6877</b>   | <b>6277</b>   | <b>13154</b>  |
| Replication        | TaqMan                            | Jinan, China <sup>a</sup>    | 1,215         | 1,205         | 2420          |
|                    | TaqMan                            | Wuhan, China                 | 364           | 460           | 824           |
|                    | TaqMan                            | Shenyang, China <sup>b</sup> | 628           | 645           | 1273          |
|                    | TaqMan                            | Nanjing, China               | 504           | 500           | 1004          |
|                    | TaqMan                            | Beijing, China               | 445           | 417           | 862           |
|                    | TaqMan                            | Tianjin, China               | 310           | 309           | 619           |
|                    | TaqMan                            | Shanghai, China <sup>c</sup> | 762           | 286           | 1048          |
|                    | TaqMan                            | Taiwan <sup>d</sup>          | 419           | 277           | 696           |
|                    | TaqMan                            | NCCI, Japan                  | 110           | 213           | 323           |
|                    | TaqMan                            | NCCH, Japan                  | 364           | 351           | 715           |
|                    | Invader                           | BBJ NCCH, Japan              | 654           | 2,211         | 2865          |
|                    | TaqMan                            | Japan NCCI JPHC <sup>e</sup> | 103           | 172           | 275           |
|                    | <b>Subtotal</b>                   |                              |               | <b>5,878</b>  | <b>7,046</b>  |
| <b>Grand Total</b> |                                   |                              | <b>12,755</b> | <b>13,323</b> | <b>26,078</b> |

<sup>a</sup> Cases and controls were enrolled at Shandong Tumor Hospital; <sup>b</sup> Samples were genotyped at Tianjing; <sup>c</sup> Part of the samples were collected and genotyped by Shanghai Pulmonary Hospital, and part of the samples were collected by Fudan University and genotyped at Tianjin; <sup>d</sup> Part of the samples was genotyped in CGR, NCI; <sup>e</sup> Samples were genotyped in CGR, NCI
