# Supplementary material
Source: PubMed Central journal article supplement (PMC4731021)
Supplement: supp_ddv494_ddv494supp_table2.pdf [file supp_ddv494_ddv494supp_table2.pdf]

**Supplementary Table 2 Meta analysis of overall lung cancer cases versus controls for 13 SNPs**

| SNP        | CHR | LOC      | GROUP          | EA* | EAF** | OR   | CI          | P        | Phet     |
|------------|-----|----------|----------------|-----|-------|------|-------------|----------|----------|
| rs7741164  | 6   | 41493412 | NCI            | A   | 0.309 | 1.14 | (1.06-1.24) | 8.75E-04 |          |
| rs7741164  | 6   | 41493412 | Nanjing_Scan   | A   | 0.347 | 1.11 | (0.88-1.40) | 3.71E-01 |          |
| rs7741164  | 6   | 41493412 | Japan610       | A   | 0.312 | 1.09 | (0.70-1.70) | 7.12E-01 |          |
| rs7741164  | 6   | 41493412 | JapanOmniEx    | A   | 0.272 | 1.43 | (1.20-1.70) | 5.18E-05 |          |
| rs7741164  | 6   | 41493412 | Jinan          | T   | 0.318 | 1.29 | (1.15-1.46) | 2.23E-05 |          |
| rs7741164  | 6   | 41493412 | Taiwan         | T   | 0.350 | 1.19 | (0.95-1.50) | 1.37E-01 |          |
| rs7741164  | 6   | 41493412 | Beijing        | T   | 0.318 | 1.30 | (1.06-1.60) | 1.18E-02 |          |
| rs7741164  | 6   | 41493412 | Nanjing_TaqMan | T   | 0.337 | 1.21 | (1.01-1.45) | 4.12E-02 |          |
| rs7741164  | 6   | 41493412 | Tianjin        | T   | 0.337 | 1.28 | (1.01-1.62) | 3.97E-02 |          |
| rs7741164  | 6   | 41493412 | Shenyang       | T   | 0.333 | 1.06 | (0.90-1.25) | 4.84E-01 |          |
| rs7741164  | 6   | 41493412 | Shanghai       | T   | 0.341 | 1.14 | (0.93-1.41) | 2.13E-01 |          |
| rs7741164  | 6   | 41493412 | CGR            | T   | 0.311 | 0.92 | (0.62-1.37) | 6.86E-01 |          |
| rs7741164  | 6   | 41493412 | Wuhan          | T   | 0.346 | 1.10 | (0.88-1.37) | 3.90E-01 |          |
| rs7741164  | 6   | 41493412 | Japan_NCCI     | T   | 0.300 | 1.42 | (1.00-2.01) | 5.29E-02 |          |
| rs7741164  | 6   | 41493412 | Japan_NCCH     | T   | 0.326 | 0.94 | (0.73-1.20) | 6.00E-01 |          |
| rs7741164  | 6   | 41493412 | Japan_BBJ_NCCH | T   | 0.287 | 1.07 | (0.92-1.24) | 3.70E-01 |          |
| rs7741164  | 6   | 41493412 | Combined       |     |       | 1.17 | (1.12-1.22) | 5.80E-13 | 2.17E-01 |
| rs72658409 | 9   | 22160087 | NCI            | T   | 0.073 | 0.76 | (0.68-0.86) | 1.07E-05 |          |
| rs72658409 | 9   | 22160087 | Nanjing_Scan   | T   | 0.075 | 0.85 | (0.55-1.32) | 4.64E-01 |          |
| rs72658409 | 9   | 22160087 | Japan610       | T   | 0.061 | 0.55 | (0.33-0.92) | 2.18E-02 |          |
| rs72658409 | 9   | 22160087 | JapanOmniEx    | T   | 0.051 | 0.68 | (0.48-0.96) | 3.01E-02 |          |
| rs72658409 | 9   | 22160087 | Jinan          | T   | 0.073 | 0.74 | (0.59-0.94) | 1.24E-02 |          |
| rs72658409 | 9   | 22160087 | Taiwan         | T   | 0.063 | 0.71 | (0.44-1.15) | 1.61E-01 |          |
| rs72658409 | 9   | 22160087 | Beijing        | T   | 0.079 | 0.97 | (0.66-1.41) | 8.63E-01 |          |
| rs72658409 | 9   | 22160087 | Nanjing_TaqMan | T   | 0.084 | 0.63 | (0.44-0.90) | 1.16E-02 |          |
| rs72658409 | 9   | 22160087 | Shenyang       | T   | 0.085 | 0.70 | (0.52-0.93) | 1.46E-02 |          |

|            |    |          |                |   |       |      |             |          |          |
|------------|----|----------|----------------|---|-------|------|-------------|----------|----------|
| rs72658409 | 9  | 22160087 | Shanghai       | T | 0.058 | 1.33 | (0.88-2.00) | 1.79E-01 |          |
| rs72658409 | 9  | 22160087 | CGR            | T | 0.047 | 1.03 | (0.47-2.23) | 9.48E-01 |          |
| rs72658409 | 9  | 22160087 | Wuhan          | T | 0.094 | 0.69 | (0.47-1.01) | 5.70E-02 |          |
| rs72658409 | 9  | 22160087 | Japan_NCCI     | T | 0.047 | 1.30 | (0.68-2.49) | 4.26E-01 |          |
| rs72658409 | 9  | 22160087 | Japan_NCCH     | T | 0.053 | 1.01 | (0.57-1.79) | 9.70E-01 |          |
| rs72658409 | 9  | 22160087 | Japan_BBJ_NCCH | T | 0.049 | 0.81 | (0.58-1.14) | 2.20E-01 |          |
| rs72658409 | 9  | 22160087 | Combined       |   |       | 0.77 | (0.72-0.84) | 1.41E-10 | 2.79E-01 |
| rs11610143 | 12 | 52349071 | NCI            | G | 0.315 | 0.87 | (0.82-0.93) | 1.97E-05 |          |
| rs11610143 | 12 | 52349071 | Nanjing_Scan   | G | 0.327 | 1.02 | (0.80-1.31) | 8.45E-01 |          |
| rs11610143 | 12 | 52349071 | Japan610       | G | 0.317 | 0.89 | (0.69-1.14) | 3.42E-01 |          |
| rs11610143 | 12 | 52349071 | JapanOmniEx    | G | 0.350 | 0.85 | (0.73-0.98) | 2.49E-02 |          |
| rs11610143 | 12 | 52349071 | Jinan          | G | 0.343 | 0.90 | (0.80-1.01) | 6.72E-02 |          |
| rs11610143 | 12 | 52349071 | Taiwan         | G | 0.291 | 0.71 | (0.55-0.92) | 9.06E-03 |          |
| rs11610143 | 12 | 52349071 | Beijing        | G | 0.322 | 0.93 | (0.75-1.16) | 5.35E-01 |          |
| rs11610143 | 12 | 52349071 | Nanjing_TaqMan | G | 0.303 | 0.96 | (0.79-1.17) | 7.18E-01 |          |
| rs11610143 | 12 | 52349071 | Tianjin        | G | 0.325 | 0.91 | (0.72-1.17) | 4.72E-01 |          |
| rs11610143 | 12 | 52349071 | Shenyang       | G | 0.345 | 0.93 | (0.79-1.10) | 4.05E-01 |          |
| rs11610143 | 12 | 52349071 | Shanghai       | G | 0.301 | 0.88 | (0.68-1.15) | 3.58E-01 |          |
| rs11610143 | 12 | 52349071 | CGR            | G | 0.330 | 1.28 | (0.88-1.87) | 2.00E-01 |          |
| rs11610143 | 12 | 52349071 | Japan_NCCI     | G | 0.387 | 0.77 | (0.56-1.07) | 1.17E-01 |          |
| rs11610143 | 12 | 52349071 | Japan_NCCH     | G | 0.317 | 0.92 | (0.72-1.18) | 5.10E-01 |          |
| rs11610143 | 12 | 52349071 | Japan_BBJ_NCCH | G | 0.362 | 0.87 | (0.75-1.01) | 6.50E-02 |          |
| rs11610143 | 12 | 52349071 | Combined       |   |       | 0.89 | (0.85-0.92) | 4.96E-09 | 7.16E-01 |
| rs3794742  | 17 | 76165548 | NCI            | A | 0.517 | 0.88 | (0.83-0.93) | 1.23E-05 |          |
| rs3794742  | 17 | 76165548 | Nanjing_Scan   | A | 0.514 | 0.80 | (0.62-1.02) | 7.30E-02 |          |
| rs3794742  | 17 | 76165548 | Japan610       | A | 0.564 | 0.96 | (0.76-1.20) | 6.90E-01 |          |
| rs3794742  | 17 | 76165548 | JapanOmniEx    | A | 0.572 | 0.85 | (0.74-0.98) | 2.14E-02 |          |
| rs3794742  | 17 | 76165548 | Jinan          | A | 0.515 | 0.99 | (0.88-1.10) | 8.08E-01 |          |

|           |    |          |                |   |       |      |             |          |          |
|-----------|----|----------|----------------|---|-------|------|-------------|----------|----------|
| rs3794742 | 17 | 76165548 | Taiwan         | A | 0.493 | 0.97 | (0.78-1.20) | 7.97E-01 |          |
| rs3794742 | 17 | 76165548 | Beijing        | A | 0.527 | 0.95 | (0.78-1.15) | 6.04E-01 |          |
| rs3794742 | 17 | 76165548 | Nanjing_TaqMan | A | 0.514 | 0.93 | (0.78-1.11) | 4.10E-01 |          |
| rs3794742 | 17 | 76165548 | Tianjin        | A | 0.495 | 1.08 | (0.86-1.36) | 4.90E-01 |          |
| rs3794742 | 17 | 76165548 | Shenyang       | A | 0.560 | 0.72 | (0.61-0.84) | 2.58E-05 |          |
| rs3794742 | 17 | 76165548 | Shanghai       | A | 0.500 | 1.04 | (0.85-1.26) | 7.21E-01 |          |
| rs3794742 | 17 | 76165548 | CGR            | A | 0.564 | 1.20 | (0.83-1.72) | 3.32E-01 |          |
| rs3794742 | 17 | 76165548 | Wuhan          | A | 0.521 | 1.11 | (0.90-1.36) | 3.31E-01 |          |
| rs3794742 | 17 | 76165548 | Japan_NCCI     | A | 0.507 | 1.13 | (0.81-1.57) | 4.72E-01 |          |
| rs3794742 | 17 | 76165548 | Japan_NCCH     | A | 0.568 | 0.99 | (0.78-1.26) | 9.30E-01 |          |
| rs3794742 | 17 | 76165548 | Japan_BBJ_NCCH | A | 0.582 | 0.88 | (0.76-1.01) | 6.60E-02 |          |
| rs3794742 | 17 | 76165548 | Combined       |   |       | 0.91 | (0.88-0.94) | 4.29E-07 | 2.66E-02 |
| rs4921799 | 8  | 17507964 | NCI            | G | 0.829 | 0.88 | (0.81-0.94) | 5.79E-04 |          |
| rs4921799 | 8  | 17507964 | Nanjing_Scan   | G | 0.844 | 0.81 | (0.59-1.11) | 1.85E-01 |          |
| rs4921799 | 8  | 17507964 | Japan610       | G | 0.761 | 0.85 | (0.64-1.11) | 2.29E-01 |          |
| rs4921799 | 8  | 17507964 | JapanOmniEx    | G | 0.797 | 0.78 | (0.66-0.91) | 2.07E-03 |          |
| rs4921799 | 8  | 17507964 | Jinan          | G | 0.823 | 1.00 | (0.88-1.13) | 9.88E-01 |          |
| rs4921799 | 8  | 17507964 | Taiwan         | G | 0.845 | 0.78 | (0.58-1.06) | 1.11E-01 |          |
| rs4921799 | 8  | 17507964 | Beijing        | G | 0.842 | 1.10 | (0.83-1.45) | 5.19E-01 |          |
| rs4921799 | 8  | 17507964 | Nanjing_TaqMan | G | 0.853 | 0.83 | (0.65-1.06) | 1.35E-01 |          |
| rs4921799 | 8  | 17507964 | Tianjin        | G | 0.900 | 0.67 | (0.48-0.95) | 2.20E-02 |          |
| rs4921799 | 8  | 17507964 | Shenyang       | G | 0.860 | 0.73 | (0.58-0.91) | 5.04E-03 |          |
| rs4921799 | 8  | 17507964 | Shanghai       | G | 0.811 | 1.34 | (1.03-1.74) | 2.69E-02 |          |
| rs4921799 | 8  | 17507964 | CGR            | G | 0.805 | 0.79 | (0.51-1.22) | 2.85E-01 |          |
| rs4921799 | 8  | 17507964 | Wuhan          | G | 0.870 | 1.10 | (0.81-1.50) | 5.24E-01 |          |
| rs4921799 | 8  | 17507964 | Japan_NCCI     | G | 0.779 | 0.74 | (0.51-1.08) | 1.23E-01 |          |
| rs4921799 | 8  | 17507964 | Japan_NCCH     | G | 0.785 | 0.97 | (0.73-1.28) | 8.10E-01 |          |
| rs4921799 | 8  | 17507964 | Japan_BBJ_NCCH | C | 0.771 | 0.99 | (0.84-1.17) | 8.90E-01 |          |
| rs4921799 | 8  | 17507964 | Combined       |   |       | 0.89 | (0.85-0.94) | 3.12E-06 | 1.28E-02 |

|            |    |           |                |   |       |      |             |          |          |
|------------|----|-----------|----------------|---|-------|------|-------------|----------|----------|
| rs10969557 | 9  | 310970    | NCI            | G | 0.227 | 1.16 | (1.08-1.24) | 3.74E-05 |          |
| rs10969557 | 9  | 310970    | Nanjing_Scan   | G | 0.207 | 1.17 | (0.88-1.56) | 2.84E-01 |          |
| rs10969557 | 9  | 310970    | Japan610       | G | 0.251 | 0.96 | (0.72-1.26) | 7.47E-01 |          |
| rs10969557 | 9  | 310970    | JapanOmniEx    | G | 0.227 | 1.33 | (1.13-1.57) | 7.00E-04 |          |
| rs10969557 | 9  | 310970    | Jinan          | G | 0.211 | 1.00 | (0.87-1.14) | 9.65E-01 |          |
| rs10969557 | 9  | 310970    | Taiwan         | G | 0.217 | 1.12 | (0.86-1.46) | 3.94E-01 |          |
| rs10969557 | 9  | 310970    | Beijing        | G | 0.232 | 1.02 | (0.81-1.29) | 8.59E-01 |          |
| rs10969557 | 9  | 310970    | Nanjing_TaqMan | G | 0.216 | 1.03 | (0.83-1.29) | 7.59E-01 |          |
| rs10969557 | 9  | 310970    | Tianjin        | G | 0.217 | 0.94 | (0.71-1.23) | 6.50E-01 |          |
| rs10969557 | 9  | 310970    | Shenyang       | G | 0.219 | 1.06 | (0.88-1.28) | 5.48E-01 |          |
| rs10969557 | 9  | 310970    | Shanghai       | G | 0.231 | 0.99 | (0.74-1.33) | 9.70E-01 |          |
| rs10969557 | 9  | 310970    | CGR            | G | 0.281 | 0.71 | (0.47-1.08) | 1.04E-01 |          |
| rs10969557 | 9  | 310970    | Japan_NCCI     | G | 0.258 | 1.00 | (0.67-1.50) | 1.00E+00 |          |
| rs10969557 | 9  | 310970    | Japan_NCCH     | G | 0.231 | 1.06 | (0.79-1.41) | 7.10E-01 |          |
| rs10969557 | 9  | 310970    | Japan_BBJ_NCCH | G | 0.238 | 1.21 | (1.03-1.42) | 2.20E-02 |          |
| rs10969557 | 9  | 310970    | Combined       |   |       | 1.11 | (1.06-1.16) | 5.87E-06 | 1.83E-01 |
| rs10854241 | 20 | 18175352  | NCI            | G | 0.222 | 1.16 | (1.08-1.25) | 5.77E-05 |          |
| rs10854241 | 20 | 18175352  | Nanjing_Scan   | G | 0.213 | 1.40 | (1.06-1.84) | 1.72E-02 |          |
| rs10854241 | 20 | 18175352  | Japan610       | G | 0.189 | 1.03 | (0.73-1.44) | 8.83E-01 |          |
| rs10854241 | 20 | 18175352  | JapanOmniEx    | G | 0.166 | 1.21 | (0.99-1.47) | 6.16E-02 |          |
| rs10854241 | 20 | 18175352  | Jinan          | G | 0.185 | 1.08 | (0.94-1.24) | 2.95E-01 |          |
| rs10854241 | 20 | 18175352  | Taiwan         | G | 0.375 | 0.43 | (0.20-0.92) | 2.54E-02 |          |
| rs10854241 | 20 | 18175352  | Nanjing_TaqMan | G | 0.202 | 0.83 | (0.66-1.05) | 1.15E-01 |          |
| rs10854241 | 20 | 18175352  | CGR            | G | 0.145 | 0.68 | (0.39-1.19) | 1.75E-01 |          |
| rs10854241 | 20 | 18175352  | Combined       |   |       | 1.12 | (1.06-1.18) | 8.51E-05 | 5.65E-03 |
| rs55750811 | 10 | 131316206 | NCI            | C | 0.019 | 1.57 | (1.29-1.92) | 7.99E-06 |          |
| rs55750811 | 10 | 131316206 | Nanjing_Scan   | C | 0.026 | 0.73 | (0.32-1.66) | 4.57E-01 |          |

|            |    |           |                |   |       |      |             |          |          |
|------------|----|-----------|----------------|---|-------|------|-------------|----------|----------|
| rs55750811 | 10 | 131316206 | Japan610       | C | 0.078 | 1.25 | (0.82-1.90) | 2.93E-01 |          |
| rs55750811 | 10 | 131316206 | JapanOmniEx    | C | 0.070 | 1.34 | (1.03-1.74) | 2.70E-02 |          |
| rs55750811 | 10 | 131316206 | Beijing        | C | 0.014 | 1.17 | (0.52-2.65) | 7.08E-01 |          |
| rs55750811 | 10 | 131316206 | Nanjing_TaqMan | C | 0.012 | 0.97 | (0.43-2.19) | 9.42E-01 |          |
| rs55750811 | 10 | 131316206 | Shenyang       | C | 0.038 | 1.02 | (0.68-1.53) | 9.18E-01 |          |
| rs55750811 | 10 | 131316206 | Shanghai       | C | 0.010 | 1.14 | (0.36-3.66) | 8.23E-01 |          |
| rs55750811 | 10 | 131316206 | CGR            | C | 0.062 | 0.76 | (0.36-1.63) | 4.82E-01 |          |
| rs55750811 | 10 | 131316206 | Japan_NCCI     | C | 0.085 | 1.08 | (0.63-1.87) | 7.77E-01 |          |
| rs55750811 | 10 | 131316206 | Japan_NCCH     | C | 0.076 | 1.08 | (0.67-1.72) | 7.50E-01 |          |
| rs55750811 | 10 | 131316206 | Japan_BBJ_NCCH | C | 0.092 | 0.98 | (0.77-1.25) | 8.70E-01 |          |
| rs55750811 | 10 | 131316206 | Combined       |   |       | 1.22 | (1.10-1.36) | 3.20E-04 | 2.07E-01 |
| rs76677882 | 4  | 44187929  | NCI            | T | 0.053 | 1.27 | (1.11-1.46) | 8.02E-04 |          |
| rs76677882 | 4  | 44187929  | Nanjing_Scan   | T | 0.068 | 1.25 | (0.79-1.98) | 3.31E-01 |          |
| rs76677882 | 4  | 44187929  | Japan610       | T | 0.039 | 1.81 | (0.81-4.03) | 1.47E-01 |          |
| rs76677882 | 4  | 44187929  | JapanOmniEx    | T | 0.035 | 1.95 | (1.23-3.09) | 4.79E-03 |          |
| rs76677882 | 4  | 44187929  | Jinan          | A | 0.062 | 0.99 | (0.78-1.25) | 9.13E-01 |          |
| rs76677882 | 4  | 44187929  | Taiwan         | A | 0.085 | 1.05 | (0.72-1.53) | 8.05E-01 |          |
| rs76677882 | 4  | 44187929  | Beijing        | A | 0.079 | 0.88 | (0.60-1.29) | 5.10E-01 |          |
| rs76677882 | 4  | 44187929  | Nanjing_TaqMan | A | 0.082 | 0.99 | (0.71-1.39) | 9.74E-01 |          |
| rs76677882 | 4  | 44187929  | Tianjin        | A | 0.061 | 1.49 | (0.97-2.29) | 6.84E-02 |          |
| rs76677882 | 4  | 44187929  | Shenyang       | A | 0.072 | 1.20 | (0.91-1.58) | 1.91E-01 |          |
| rs76677882 | 4  | 44187929  | Shanghai       | A | 0.066 | 1.16 | (0.73-1.86) | 5.29E-01 |          |
| rs76677882 | 4  | 44187929  | CGR            | A | 0.042 | 1.14 | (0.48-2.71) | 7.60E-01 |          |
| rs76677882 | 4  | 44187929  | Japan_NCCI     | T | 0.031 | 1.04 | (0.41-2.61) | 9.37E-01 |          |
| rs76677882 | 4  | 44187929  | Japan_NCCH     | T | 0.031 | 1.11 | (0.57-2.16) | 7.60E-01 |          |
| rs76677882 | 4  | 44187929  | Japan_BBJ_NCCH | T | 0.034 | 0.82 | (0.55-1.23) | 3.50E-01 |          |
| rs76677882 | 4  | 44187929  | Combined       |   |       | 1.17 | (1.07-1.27) | 4.29E-04 | 2.66E-01 |
| rs1800378  | 12 | 6172202   | NCI            | C | 0.722 | 0.88 | (0.82-0.94) | 7.73E-05 |          |

|           |    |           |                |   |       |      |             |          |          |
|-----------|----|-----------|----------------|---|-------|------|-------------|----------|----------|
| rs1800378 | 12 | 6172202   | Nanjing_Scan   | C | 0.666 | 0.79 | (0.58-1.07) | 1.24E-01 |          |
| rs1800378 | 12 | 6172202   | Japan610       | C | 0.659 | 0.80 | (0.63-1.02) | 7.63E-02 |          |
| rs1800378 | 12 | 6172202   | JapanOmniEx    | C | 0.652 | 0.88 | (0.76-1.01) | 6.99E-02 |          |
| rs1800378 | 12 | 6172202   | Jinan          | C | 0.702 | 1.12 | (0.99-1.27) | 7.16E-02 |          |
| rs1800378 | 12 | 6172202   | Taiwan         | C | 0.739 | 0.82 | (0.64-1.05) | 1.09E-01 |          |
| rs1800378 | 12 | 6172202   | Beijing        | C | 0.707 | 1.02 | (0.82-1.27) | 8.70E-01 |          |
| rs1800378 | 12 | 6172202   | Nanjing_TaqMan | C | 0.730 | 1.01 | (0.83-1.23) | 9.38E-01 |          |
| rs1800378 | 12 | 6172202   | Tianjin        | C | 0.710 | 1.04 | (0.82-1.33) | 7.31E-01 |          |
| rs1800378 | 12 | 6172202   | Shenyang       | C | 0.729 | 0.90 | (0.76-1.07) | 2.50E-01 |          |
| rs1800378 | 12 | 6172202   | Shanghai       | C | 0.726 | 0.87 | (0.67-1.14) | 3.09E-01 |          |
| rs1800378 | 12 | 6172202   | CGR            | C | 0.638 | 1.06 | (0.75-1.51) | 7.36E-01 |          |
| rs1800378 | 12 | 6172202   | Japan_NCCI     | C | 0.601 | 1.22 | (0.87-1.71) | 2.59E-01 |          |
| rs1800378 | 12 | 6172202   | Japan_NCCH     | C | 0.617 | 1.16 | (0.90-1.48) | 2.50E-01 |          |
| rs1800378 | 12 | 6172202   | Japan_BBJ_NCCH | G | 0.615 | 1.05 | (0.91-1.21) | 5.50E-01 |          |
| rs1800378 | 12 | 6172202   | Combined       |   |       | 0.94 | (0.90-0.98) | 2.55E-03 | 2.10E-02 |
| rs4621673 | 7  | 155209171 | NCI            | T | 0.435 | 0.88 | (0.83-0.93) | 1.16E-05 |          |
| rs4621673 | 7  | 155209171 | Nanjing_Scan   | T | 0.387 | 1.05 | (0.81-1.35) | 7.27E-01 |          |
| rs4621673 | 7  | 155209171 | Japan610       | T | 0.352 | 0.72 | (0.57-0.92) | 9.23E-03 |          |
| rs4621673 | 7  | 155209171 | JapanOmniEx    | T | 0.334 | 0.93 | (0.81-1.07) | 3.26E-01 |          |
| rs4621673 | 7  | 155209171 | Jinan          | T | 0.425 | 1.01 | (0.90-1.13) | 8.93E-01 |          |
| rs4621673 | 7  | 155209171 | Taiwan         | T | 0.422 | 1.10 | (0.88-1.37) | 4.11E-01 |          |
| rs4621673 | 7  | 155209171 | Beijing        | T | 0.397 | 1.22 | (1.00-1.49) | 5.30E-02 |          |
| rs4621673 | 7  | 155209171 | Nanjing_TaqMan | T | 0.408 | 1.17 | (0.98-1.41) | 8.47E-02 |          |
| rs4621673 | 7  | 155209171 | Tianjin        | T | 0.417 | 1.09 | (0.86-1.38) | 4.70E-01 |          |
| rs4621673 | 7  | 155209171 | Shenyang       | T | 0.416 | 0.99 | (0.85-1.16) | 8.96E-01 |          |
| rs4621673 | 7  | 155209171 | Shanghai       | T | 0.420 | 1.01 | (0.80-1.29) | 9.15E-01 |          |
| rs4621673 | 7  | 155209171 | CGR            | T | 0.354 | 0.79 | (0.54-1.16) | 2.28E-01 |          |
| rs4621673 | 7  | 155209171 | Japan_NCCI     | T | 0.308 | 1.01 | (0.71-1.42) | 9.77E-01 |          |
| rs4621673 | 7  | 155209171 | Japan_NCCH     | T | 0.298 | 1.37 | (1.06-1.78) | 1.70E-02 |          |

|            |    |           |                |   |       |      |             |          |          |
|------------|----|-----------|----------------|---|-------|------|-------------|----------|----------|
| rs4621673  | 7  | 155209171 | Japan_BBJ_NCCH | T | 0.336 | 0.90 | (0.77-1.05) | 1.60E-01 |          |
| rs4621673  | 7  | 155209171 | Combined       |   |       | 0.95 | (0.91-0.99) | 9.91E-03 | 6.49E-04 |
| rs911499   | 11 | 34240897  | NCI            | G | 0.867 | 0.85 | (0.78-0.92) | 1.40E-04 |          |
| rs911499   | 11 | 34240897  | Nanjing_Scan   | G | 0.853 | 0.96 | (0.70-1.31) | 7.95E-01 |          |
| rs911499   | 11 | 34240897  | Japan610       | G | 0.910 | 0.93 | (0.61-1.43) | 7.48E-01 |          |
| rs911499   | 11 | 34240897  | JapanOmniEx    | G | 0.907 | 0.73 | (0.59-0.92) | 6.07E-03 |          |
| rs911499   | 11 | 34240897  | Jinan          | G | 0.737 | 1.06 | (0.95-1.18) | 3.07E-01 |          |
| rs911499   | 11 | 34240897  | Taiwan         | G | 0.845 | 1.03 | (0.76-1.40) | 8.29E-01 |          |
| rs911499   | 11 | 34240897  | Nanjing_TaqMan | G | 0.845 | 1.24 | (0.96-1.60) | 9.51E-02 |          |
| rs911499   | 11 | 34240897  | Tianjin        | G | 0.836 | 1.09 | (0.80-1.49) | 5.88E-01 |          |
| rs911499   | 11 | 34240897  | Shenyang       | G | 0.856 | 0.95 | (0.75-1.19) | 6.41E-01 |          |
| rs911499   | 11 | 34240897  | Shanghai       | G | 0.837 | 1.04 | (0.76-1.44) | 7.94E-01 |          |
| rs911499   | 11 | 34240897  | CGR            | G | 0.869 | 2.63 | (1.29-5.36) | 6.21E-03 |          |
| rs911499   | 11 | 34240897  | Japan_NCCI     | G | 0.925 | 0.47 | (0.27-0.80) | 5.60E-03 |          |
| rs911499   | 11 | 34240897  | Japan_NCCH     | G | 0.897 | 1.12 | (0.73-1.73) | 6.10E-01 |          |
| rs911499   | 11 | 34240897  | Japan_BBJ_NCCH | C | 0.898 | 0.98 | (0.78-1.23) | 8.70E-01 |          |
| rs911499   | 11 | 34240897  | Combined       |   |       | 0.94 | (0.89-0.99) | 2.10E-02 | 5.17E-04 |
| rs78662068 | 4  | 44214815  | NCI            | C | 0.053 | 1.25 | (1.09-1.44) | 1.78E-03 |          |
| rs78662068 | 4  | 44214815  | Nanjing_Scan   | C | 0.066 | 1.26 | (0.80-1.97) | 3.24E-01 |          |
| rs78662068 | 4  | 44214815  | Japan610       | C | 0.038 | 1.71 | (0.79-3.74) | 1.76E-01 |          |
| rs78662068 | 4  | 44214815  | JapanOmniEx    | C | 0.034 | 2.02 | (1.29-3.18) | 2.19E-03 |          |
| rs78662068 | 4  | 44214815  | Jinan          | G | 0.148 | 0.87 | (0.77-0.99) | 3.53E-02 |          |
| rs78662068 | 4  | 44214815  | Taiwan         | G | 0.081 | 1.02 | (0.69-1.52) | 9.07E-01 |          |
| rs78662068 | 4  | 44214815  | Beijing        | G | 0.064 | 0.91 | (0.60-1.39) | 6.73E-01 |          |
| rs78662068 | 4  | 44214815  | CGR            | G | 0.038 | 1.34 | (0.56-3.21) | 5.14E-01 |          |
| rs78662068 | 4  | 44214815  | Japan_NCCI     | G | 0.028 | 1.12 | (0.44-2.86) | 8.09E-01 |          |
| rs78662068 | 4  | 44214815  | Japan_NCCH     | G | 0.032 | 1.02 | (0.51-2.00) | 9.70E-01 |          |
| rs78662068 | 4  | 44214815  | Japan_BBJ_NCCH | G | 0.033 | 0.74 | (0.49-1.12) | 1.60E-01 |          |

|            |   |          |          |      |             |          |          |
|------------|---|----------|----------|------|-------------|----------|----------|
| rs78662068 | 4 | 44214815 | Combined | 1.05 | (0.96-1.14) | 2.72E-01 | 1.89E-03 |
|------------|---|----------|----------|------|-------------|----------|----------|

\*EA, Effect Allele; \*\*EAF, Effect Allele Frequency in controls
