# Supplementary material
Source: PubMed Central journal article supplement (PMC4731021)
Supplement: supp_ddv494_ddv494supp_table3.pdf [file supp_ddv494_ddv494supp_table3.pdf]

Supplementary Table 3 *In silico* functional look-up in HaploReg V3 and RegulomeDB V1.1

| chr | pos[hg38] | LDV <sup>1</sup> * | LDV <sup>2</sup> * | variant    | Ref | Alt | AFR  | Alternative allele frequency | EUR  | Conservation | Histone marks | Proteins bound | Motifs changed | Drivers disrupted | GENCODE genes | Risefsc genes | dbSNP func annot | RegulomeDB score <sup>†</sup> |
|-----|-----------|--------------------|--------------------|------------|-----|-----|------|------------------------------|------|--------------|---------------|----------------|----------------|-------------------|---------------|---------------|------------------|-------------------------------|
|     |           |                    |                    |            |     |     | AMR  | ASN                          | GERP | sPphy        | Promoter      | Enhancer       | Disease        |                   |               |               |                  |                               |
| 6   | 4,1E+07   | 0.84               | -0.95              | r3295644   | A   | C   | 0.69 | 0.82                         | 0.66 | 0.97         |               |                |                |                   |               |               |                  |                               |
| 6   | 4,1E+07   | 0.83               | 0.94               | r181350472 | A   | G   | 0.11 | 0.17                         | 0.34 | 0.03         |               | IPSC, LIV      |                |                   |               |               |                  |                               |
| 6   | 4,1E+07   | 0.86               | 0.95               | r59367107  | G   | A   | 0.12 | 0.17                         | 0.34 | 0.03         |               |                |                |                   |               |               |                  |                               |
| 6   | 4,1E+07   | 0.95               | 0.98               | r125660421 | G   | A   | 0.06 | 0.17                         | 0.33 | 0.03         |               |                |                |                   |               |               |                  |                               |
| 6   | 4,1E+07   | 0.89               | -0.96              | r1977358   | T   | C   | 0.75 | 0.82                         | 0.66 | 0.97         |               |                |                |                   |               |               |                  |                               |
| 6   | 4,1E+07   | 0.95               | 0.98               | r1977357   | T   | C   | 0.75 | 0.82                         | 0.67 | 0.97         |               | GI, LIV        |                |                   |               |               |                  |                               |
| 6   | 4,1E+07   | 0.95               | 0.98               | r54435745  | G   | C   | 0.06 | 0.17                         | 0.33 | 0.03         |               |                |                |                   |               |               |                  |                               |
| 6   | 4,1E+07   | 0.94               | 0.99               | r774164    | G   | A   | 0.06 | 0.17                         | 0.33 | 0.03         |               |                |                |                   |               |               |                  |                               |
| 6   | 4,1E+07   | 0.94               | 0.99               | r1855837   | C   | A   | 0.19 | 0.21                         | 0.32 | 0.11         |               |                |                |                   |               |               |                  |                               |
| 9   | 2,2E+07   | 1                  | 1                  | r72558469  | C   | T   | 0.16 | 0.05                         | 0.09 | 0.07         |               |                |                |                   |               |               |                  |                               |
| 9   | 2,2E+07   | 1                  | 1                  | r10965267  | T   | G   | 0.19 | 0.05                         | 0.09 | 0.08         |               |                |                |                   |               |               |                  |                               |
| 9   | 2,2E+07   | 1                  | 1                  | r10965270  | G   | A/C | 0.01 | 0.02                         | 0.09 | 0.06         |               |                |                |                   |               |               |                  |                               |
| 9   | 2,2E+07   | 0.94               | -0.98              | r861190    | G   | A   | 0.8  | 0.95                         | 0.91 | 0.93         |               |                |                |                   |               |               |                  |                               |
| 12  | 5,2E+07   | 0.93               | 0.98               | r61914027  | C   | C   | 0.06 | 0.49                         | 0.3  | 0.21         |               |                |                |                   |               |               |                  |                               |
| 12  | 5,2E+07   | 0.9                | 0.96               | r58617820  | T   | A   | 0.35 | 0.54                         | 0.3  | 0.24         |               |                |                |                   |               |               |                  |                               |
| 12  | 5,2E+07   | 0.92               | 0.97               | r61914028  | G   | A   | 0.11 | 0.5                          | 0.3  | 0.23         |               |                |                |                   |               |               |                  |                               |
| 12  | 5,2E+07   | 0.88               | 0.99               | r6761839   | G   | A   | 0.04 | 0.49                         | 0.31 | 0.2          |               |                |                |                   |               |               |                  |                               |
| 12  | 5,2E+07   | 0.85               | -1                 | r7926469   | A   | G   | 0.22 | 0.38                         | 0.66 | 0.65         |               |                |                |                   |               |               |                  |                               |
| 12  | 5,2E+07   | 1                  | 1                  | r11616143  | T   | C   | 0.04 | 0.49                         | 0.31 | 0.2          |               |                |                |                   |               |               |                  |                               |
| 12  | 5,2E+07   | 1                  | 1                  | r11616143  | T   | C   | 0.04 | 0.49                         | 0.31 | 0.2          |               |                |                |                   |               |               |                  |                               |
| 12  | 5,2E+07   | 1                  | 1                  | r7926469   | C   | A   | 0.04 | 0.49                         | 0.31 | 0.2          |               |                |                |                   |               |               |                  |                               |
| 12  | 5,2E+07   | 1                  | 1                  | r61914045  | G   | A   | 0.04 | 0.49                         | 0.31 | 0.2          |               |                |                |                   |               |               |                  |                               |
| 12  | 5,2E+07   | 0.82               | 1                  | r61914045  | G   | A   | 0.04 | 0.49                         | 0.31 | 0.2          |               |                |                |                   |               |               |                  |                               |
| 12  | 5,2E+07   | 0.85               | 1                  | r813470    | G   | A   | 0.6  | 0.56                         | 0.34 | 0.27         |               |                |                |                   |               |               |                  |                               |
| 12  | 5,2E+07   | 0.84               | 0.93               | r11169970  | G   | A   | 0.11 | 0.51                         | 0.31 | 0.22         |               |                |                |                   |               |               |                  |                               |
| 12  | 5,2E+07   | 0.83               | 0.92               | r34437092  | A   | G   | 0.12 | 0.51                         | 0.31 | 0.22         |               |                |                |                   |               |               |                  |                               |
| 12  | 5,2E+07   | 0.86               | -0.94              | r6761841   | G   | C   | 0.92 | 0.92                         | 0.7  | 0.79         |               |                |                |                   |               |               |                  |                               |
| 12  | 5,2E+07   | 0.8                | -0.92              | r6761842   | G   | C   | 0.92 | 0.92                         | 0.68 | 0.79         |               |                |                |                   |               |               |                  |                               |
| 17  | 7,6E+07   | 0.9                | 0.98               | r5908045   | G   | C   | 0.65 | 0.73                         | 0.53 | 0.52         |               |                |                |                   |               |               |                  |                               |
| 17  | 7,6E+07   | 0.98               | 1                  | r5908049   | C   | T   | 0.58 | 0.57                         | 0.53 | 0.41         |               |                |                |                   |               |               |                  |                               |
| 17  | 7,6E+07   | 1                  | 1                  | r3794742   | G   | A   | 0.59 | 0.58                         | 0.53 | 0.41         |               |                |                |                   |               |               |                  |                               |
| 17  | 7,6E+07   | 0.98               | 1                  | r3829575   | C   | T   | 0.6  | 0.59                         | 0.53 | 0.41         |               |                |                |                   |               |               |                  |                               |
| 17  | 7,6E+07   | 0.97               | 1                  | r870355    | A   | G   | 0.59 | 0.54                         | 0.41 | 0.41         |               |                |                |                   |               |               |                  |                               |
| 17  | 7,6E+07   | 0.98               | 1                  | r1810063   | G   | A   | 0.59 | 0.59                         | 0.53 | 0.41         |               |                |                |                   |               |               |                  |                               |
| 17  | 7,6E+07   | 0.97               | 1                  | r4588318   | C   | A   | 0.51 | 0.57                         | 0.54 | 0.41         |               |                |                |                   |               |               |                  |                               |

\* LD calculation was limited to the 1000G Phase 1 ASN population and the threshold was set to >2x10<sup>-8</sup>.  
 † RegulomeDB scores: 1a, eQTL + TF binding + matched TF motif + DNase footprint + DNase peak; 1c, eQTL + TF binding + any motif + DNase footprint + DNase peak; 1d, eQTL + TF binding + any motif + DNase peak; 1e, eQTL + TF binding + DNase footprint + DNase peak; 2a, TF binding + matched TF motif + DNase footprint + DNase peak; 2b, TF binding + any motif + DNase footprint + DNase peak; 2c, TF binding + matched TF motif + DNase peak; 3a, TF binding; 3b, TF binding + matched TF motif; 4, TF binding + DNase peak; 5, other.
