# Supplementary material
Source: PubMed Central journal article supplement (PMC4731021)
Supplement: supp_ddv494_ddv494supp_table4.pdf [file supp_ddv494_ddv494supp_table4.pdf]

**Supplementary Table 4 Meta analysis of all samples with TaqMan data for rs7741164**

| SNP       | GROUP           | NUM_CONTROL | NUM_CASE | EA** | EAF*** | OR   | CI          | P        | Phet     |
|-----------|-----------------|-------------|----------|------|--------|------|-------------|----------|----------|
| rs7741164 | NCI TaqMan Set* | 1479        | 1451     | A    | 0.334  | 1.24 | (1.11-1.39) | 1.12E-04 |          |
| rs7741164 | Jinan           | 1201        | 1205     | T    | 0.318  | 1.29 | (1.15-1.46) | 2.23E-05 |          |
| rs7741164 | Taiwan          | 277         | 412      | T    | 0.350  | 1.19 | (0.95-1.50) | 1.37E-01 |          |
| rs7741164 | Beijing         | 410         | 441      | T    | 0.318  | 1.30 | (1.06-1.60) | 1.18E-02 |          |
| rs7741164 | Nanjing_TaqMan  | 498         | 496      | T    | 0.337  | 1.21 | (1.01-1.45) | 4.12E-02 |          |
| rs7741164 | Tianjin         | 309         | 310      | T    | 0.337  | 1.28 | (1.01-1.62) | 3.97E-02 |          |
| rs7741164 | Shenyang        | 645         | 627      | T    | 0.333  | 1.06 | (0.90-1.25) | 4.84E-01 |          |
| rs7741164 | Shanghai        | 286         | 762      | T    | 0.341  | 1.14 | (0.93-1.41) | 2.13E-01 |          |
| rs7741164 | CGR             | 169         | 102      | T    | 0.311  | 0.92 | (0.62-1.37) | 6.86E-01 |          |
| rs7741164 | Wuhan           | 459         | 364      | T    | 0.346  | 1.10 | (0.88-1.37) | 3.90E-01 |          |
| rs7741164 | Japan_NCCI      | 213         | 110      | T    | 0.300  | 1.42 | (1.00-2.01) | 5.29E-02 |          |
| rs7741164 | Japan_NCCH      | 344         | 359      | T    | 0.326  | 0.94 | (0.73-1.20) | 6.00E-01 |          |
| rs7741164 | Japan_BBJ_NCCH  | 2208        | 654      | T    | 0.287  | 1.07 | (0.92-1.24) | 3.70E-01 |          |
| rs7741164 | Combined        | 8498        | 7293     |      |        | 1.19 | (1.12-1.25) | 3.05E-10 | 3.71E-01 |

\* Samples were drawn from part of the discovery phase. \*\*EA, Effect Allele; \*\*\*EAF, Effect Allele Frequency in controls
