# Supplementary material
Source: PubMed Central journal article supplement (PMC4731021)
Supplement: supp_ddv494_ddv494supp_table5.pdf [file supp_ddv494_ddv494supp_table5.pdf]

**Supplementary Table 5 Meta analysis of lung adenocarcinoma cases versus controls for 13 SNPs**

| SNP        | CHR | LOC      | GROUP          | EA* | EAF** | OR   | CI          | P        | Phet     |
|------------|-----|----------|----------------|-----|-------|------|-------------|----------|----------|
| rs7741164  | 6   | 41493412 | NCI            | A   | 0.308 | 1.15 | (1.05-1.25) | 1.62E-03 |          |
| rs7741164  | 6   | 41493412 | Nanjing_Scan   | A   | 0.373 | 1.16 | (0.91-1.49) | 2.28E-01 |          |
| rs7741164  | 6   | 41493412 | Japan610       | A   | 0.312 | 1.09 | (0.70-1.70) | 7.12E-01 |          |
| rs7741164  | 6   | 41493412 | JapanOmniEx    | A   | 0.272 | 1.43 | (1.20-1.70) | 5.18E-05 |          |
| rs7741164  | 6   | 41493412 | Jinan          | T   | 0.318 | 1.30 | (1.13-1.49) | 1.57E-04 |          |
| rs7741164  | 6   | 41493412 | Taiwan         | T   | 0.350 | 1.17 | (0.92-1.49) | 1.89E-01 |          |
| rs7741164  | 6   | 41493412 | Beijing        | T   | 0.318 | 1.29 | (1.04-1.59) | 1.89E-02 |          |
| rs7741164  | 6   | 41493412 | Nanjing_TaqMan | T   | 0.337 | 1.20 | (0.99-1.44) | 5.97E-02 |          |
| rs7741164  | 6   | 41493412 | Tianjin        | T   | 0.337 | 1.28 | (1.01-1.62) | 3.97E-02 |          |
| rs7741164  | 6   | 41493412 | Shenyang       | T   | 0.333 | 1.13 | (0.94-1.36) | 2.02E-01 |          |
| rs7741164  | 6   | 41493412 | Shanghai       | T   | 0.341 | 1.14 | (0.92-1.41) | 2.37E-01 |          |
| rs7741164  | 6   | 41493412 | CGR            | T   | 0.311 | 1.02 | (0.65-1.59) | 9.29E-01 |          |
| rs7741164  | 6   | 41493412 | Wuhan          | T   | 0.346 | 1.13 | (0.87-1.46) | 3.67E-01 |          |
| rs7741164  | 6   | 41493412 | Japan_NCCI     | T   | 0.300 | 1.42 | (1.00-2.01) | 5.29E-02 |          |
| rs7741164  | 6   | 41493412 | Japan_NCCH     | T   | 0.326 | 0.94 | (0.73-1.20) | 6.00E-01 |          |
| rs7741164  | 6   | 41493412 | Japan_BBJ_NCCH | T   | 0.287 | 1.07 | (0.92-1.24) | 3.70E-01 |          |
| rs7741164  | 6   | 41493412 | Combined       |     |       | 1.18 | (1.13-1.24) | 1.22E-12 | 4.40E-01 |
| rs72658409 | 9   | 22160087 | NCI            | T   | 0.073 | 0.78 | (0.68-0.89) | 2.12E-04 |          |
| rs72658409 | 9   | 22160087 | Nanjing_Scan   | T   | 0.094 | 0.55 | (0.35-0.86) | 8.83E-03 |          |
| rs72658409 | 9   | 22160087 | Japan610       | T   | 0.061 | 0.55 | (0.33-0.92) | 2.18E-02 |          |
| rs72658409 | 9   | 22160087 | JapanOmniEx    | T   | 0.051 | 0.68 | (0.48-0.96) | 3.01E-02 |          |
| rs72658409 | 9   | 22160087 | Jinan          | T   | 0.073 | 0.78 | (0.59-1.03) | 7.59E-02 |          |
| rs72658409 | 9   | 22160087 | Taiwan         | T   | 0.063 | 0.68 | (0.40-1.15) | 1.48E-01 |          |
| rs72658409 | 9   | 22160087 | Beijing        | T   | 0.079 | 0.94 | (0.63-1.39) | 7.50E-01 |          |
| rs72658409 | 9   | 22160087 | Nanjing_TaqMan | T   | 0.084 | 0.62 | (0.42-0.90) | 1.10E-02 |          |
| rs72658409 | 9   | 22160087 | Shenyang       | T   | 0.085 | 0.66 | (0.47-0.94) | 1.93E-02 |          |

|            |    |          |                |   |       |      |             |          |          |
|------------|----|----------|----------------|---|-------|------|-------------|----------|----------|
| rs72658409 | 9  | 22160087 | Shanghai       | T | 0.058 | 1.34 | (0.88-2.03) | 1.75E-01 |          |
| rs72658409 | 9  | 22160087 | CGR            | T | 0.047 | 1.12 | (0.47-2.65) | 8.01E-01 |          |
| rs72658409 | 9  | 22160087 | Wuhan          | T | 0.094 | 0.62 | (0.38-1.02) | 5.73E-02 |          |
| rs72658409 | 9  | 22160087 | Japan_NCCI     | T | 0.047 | 1.30 | (0.68-2.49) | 4.26E-01 |          |
| rs72658409 | 9  | 22160087 | Japan_NCCH     | T | 0.053 | 1.01 | (0.57-1.79) | 9.70E-01 |          |
| rs72658409 | 9  | 22160087 | Japan_BBJ_NCCH | T | 0.049 | 0.81 | (0.58-1.14) | 2.20E-01 |          |
| rs72658409 | 9  | 22160087 | Combined       |   |       | 0.77 | (0.71-0.84) | 1.94E-09 | 1.59E-01 |
| rs11610143 | 12 | 52349071 | NCI            | G | 0.315 | 0.87 | (0.81-0.93) | 4.80E-05 |          |
| rs11610143 | 12 | 52349071 | Nanjing_Scan   | G | 0.302 | 0.94 | (0.74-1.21) | 6.43E-01 |          |
| rs11610143 | 12 | 52349071 | Japan610       | G | 0.317 | 0.89 | (0.69-1.14) | 3.42E-01 |          |
| rs11610143 | 12 | 52349071 | JapanOmniEx    | G | 0.350 | 0.85 | (0.73-0.98) | 2.49E-02 |          |
| rs11610143 | 12 | 52349071 | Jinan          | G | 0.343 | 0.86 | (0.75-0.99) | 3.03E-02 |          |
| rs11610143 | 12 | 52349071 | Taiwan         | G | 0.291 | 0.66 | (0.50-0.87) | 2.89E-03 |          |
| rs11610143 | 12 | 52349071 | Beijing        | G | 0.322 | 0.95 | (0.76-1.19) | 6.55E-01 |          |
| rs11610143 | 12 | 52349071 | Nanjing_TaqMan | G | 0.303 | 0.98 | (0.80-1.19) | 8.07E-01 |          |
| rs11610143 | 12 | 52349071 | Tianjin        | G | 0.325 | 0.91 | (0.72-1.17) | 4.72E-01 |          |
| rs11610143 | 12 | 52349071 | Shenyang       | G | 0.345 | 0.93 | (0.77-1.12) | 4.43E-01 |          |
| rs11610143 | 12 | 52349071 | Shanghai       | G | 0.301 | 0.87 | (0.66-1.15) | 3.28E-01 |          |
| rs11610143 | 12 | 52349071 | CGR            | G | 0.330 | 1.24 | (0.80-1.92) | 3.40E-01 |          |
| rs11610143 | 12 | 52349071 | Japan_NCCI     | G | 0.387 | 0.77 | (0.56-1.07) | 1.17E-01 |          |
| rs11610143 | 12 | 52349071 | Japan_NCCH     | G | 0.317 | 0.92 | (0.72-1.18) | 5.10E-01 |          |
| rs11610143 | 12 | 52349071 | Japan_BBJ_NCCH | G | 0.362 | 0.87 | (0.75-1.01) | 6.50E-02 |          |
| rs11610143 | 12 | 52349071 | Combined       |   |       | 0.88 | (0.84-0.92) | 2.25E-09 | 7.69E-01 |
| rs3794742  | 17 | 76165548 | NCI            | A | 0.517 | 0.87 | (0.81-0.93) | 1.68E-05 |          |
| rs3794742  | 17 | 76165548 | Nanjing_Scan   | A | 0.486 | 0.89 | (0.70-1.14) | 3.57E-01 |          |
| rs3794742  | 17 | 76165548 | Japan610       | A | 0.564 | 0.96 | (0.76-1.20) | 6.90E-01 |          |
| rs3794742  | 17 | 76165548 | JapanOmniEx    | A | 0.572 | 0.85 | (0.74-0.98) | 2.14E-02 |          |
| rs3794742  | 17 | 76165548 | Jinan          | A | 0.515 | 0.99 | (0.87-1.13) | 8.93E-01 |          |

|            |    |          |                |   |       |      |             |          |          |
|------------|----|----------|----------------|---|-------|------|-------------|----------|----------|
| rs3794742  | 17 | 76165548 | Taiwan         | A | 0.493 | 0.96 | (0.77-1.20) | 7.10E-01 |          |
| rs3794742  | 17 | 76165548 | Beijing        | A | 0.527 | 0.93 | (0.76-1.14) | 5.07E-01 |          |
| rs3794742  | 17 | 76165548 | Nanjing_TaqMan | A | 0.514 | 0.95 | (0.79-1.14) | 5.48E-01 |          |
| rs3794742  | 17 | 76165548 | Tianjin        | A | 0.495 | 1.08 | (0.86-1.36) | 4.90E-01 |          |
| rs3794742  | 17 | 76165548 | Shenyang       | A | 0.560 | 0.71 | (0.60-0.85) | 1.78E-04 |          |
| rs3794742  | 17 | 76165548 | Shanghai       | A | 0.500 | 1.00 | (0.82-1.22) | 9.75E-01 |          |
| rs3794742  | 17 | 76165548 | CGR            | A | 0.564 | 1.21 | (0.80-1.84) | 3.74E-01 |          |
| rs3794742  | 17 | 76165548 | Wuhan          | A | 0.521 | 1.08 | (0.85-1.38) | 5.36E-01 |          |
| rs3794742  | 17 | 76165548 | Japan_NCCI     | A | 0.507 | 1.13 | (0.81-1.57) | 4.72E-01 |          |
| rs3794742  | 17 | 76165548 | Japan_NCCH     | A | 0.568 | 0.99 | (0.78-1.26) | 9.30E-01 |          |
| rs3794742  | 17 | 76165548 | Japan_BBJ_NCCH | A | 0.582 | 0.88 | (0.76-1.01) | 6.60E-02 |          |
| rs3794742  | 17 | 76165548 | Combined       |   |       | 0.91 | (0.87-0.94) | 1.06E-06 | 1.22E-01 |
| rs10969557 | 9  | 310970   | NCI            | G | 0.227 | 1.16 | (1.07-1.25) | 1.66E-04 |          |
| rs10969557 | 9  | 310970   | Nanjing_Scan   | G | 0.228 | 0.92 | (0.68-1.23) | 5.53E-01 |          |
| rs10969557 | 9  | 310970   | Japan610       | G | 0.251 | 0.96 | (0.72-1.26) | 7.47E-01 |          |
| rs10969557 | 9  | 310970   | JapanOmniEx    | G | 0.227 | 1.33 | (1.13-1.57) | 7.00E-04 |          |
| rs10969557 | 9  | 310970   | Jinan          | G | 0.211 | 0.94 | (0.80-1.10) | 4.35E-01 |          |
| rs10969557 | 9  | 310970   | Taiwan         | G | 0.217 | 1.11 | (0.84-1.46) | 4.56E-01 |          |
| rs10969557 | 9  | 310970   | Beijing        | G | 0.232 | 1.03 | (0.81-1.31) | 8.05E-01 |          |
| rs10969557 | 9  | 310970   | Nanjing_TaqMan | G | 0.216 | 1.05 | (0.84-1.32) | 6.56E-01 |          |
| rs10969557 | 9  | 310970   | Tianjin        | G | 0.217 | 0.94 | (0.71-1.23) | 6.50E-01 |          |
| rs10969557 | 9  | 310970   | Shenyang       | G | 0.219 | 1.11 | (0.90-1.37) | 3.44E-01 |          |
| rs10969557 | 9  | 310970   | Shanghai       | G | 0.231 | 0.98 | (0.72-1.33) | 8.88E-01 |          |
| rs10969557 | 9  | 310970   | CGR            | G | 0.281 | 0.78 | (0.48-1.26) | 3.05E-01 |          |
| rs10969557 | 9  | 310970   | Japan_NCCI     | G | 0.258 | 1.00 | (0.67-1.50) | 1.00E+00 |          |
| rs10969557 | 9  | 310970   | Japan_NCCH     | G | 0.231 | 1.06 | (0.79-1.41) | 7.10E-01 |          |
| rs10969557 | 9  | 310970   | Japan_BBJ_NCCH | G | 0.238 | 1.21 | (1.03-1.42) | 2.20E-02 |          |
| rs10969557 | 9  | 310970   | Combined       |   |       | 1.10 | (1.05-1.16) | 5.95E-05 | 1.69E-01 |

|            |    |           |                |   |       |      |             |          |          |
|------------|----|-----------|----------------|---|-------|------|-------------|----------|----------|
| rs55750811 | 10 | 131316206 | NCI            | C | 0.019 | 1.61 | (1.30-2.00) | 1.16E-05 |          |
| rs55750811 | 10 | 131316206 | Nanjing_Scan   | C | 0.022 | 1.32 | (0.60-2.89) | 4.89E-01 |          |
| rs55750811 | 10 | 131316206 | Japan610       | C | 0.078 | 1.25 | (0.82-1.90) | 2.93E-01 |          |
| rs55750811 | 10 | 131316206 | JapanOmniEx    | C | 0.070 | 1.34 | (1.03-1.74) | 2.70E-02 |          |
| rs55750811 | 10 | 131316206 | Beijing        | C | 0.014 | 0.96 | (0.39-2.33) | 9.25E-01 |          |
| rs55750811 | 10 | 131316206 | Shenyang       | C | 0.038 | 1.03 | (0.65-1.62) | 9.07E-01 |          |
| rs55750811 | 10 | 131316206 | Shanghai       | C | 0.010 | 1.44 | (0.45-4.62) | 5.40E-01 |          |
| rs55750811 | 10 | 131316206 | CGR            | C | 0.062 | 0.71 | (0.29-1.75) | 4.53E-01 |          |
| rs55750811 | 10 | 131316206 | Japan_NCCI     | C | 0.085 | 1.08 | (0.63-1.87) | 7.77E-01 |          |
| rs55750811 | 10 | 131316206 | Japan_NCCH     | C | 0.076 | 1.08 | (0.67-1.72) | 7.50E-01 |          |
| rs55750811 | 10 | 131316206 | Japan_BBJ_NCCH | C | 0.092 | 0.98 | (0.77-1.25) | 8.70E-01 |          |
| rs55750811 | 10 | 131316206 | Combined       |   |       | 1.24 | (1.11-1.39) | 1.88E-04 | 2.26E-01 |
| rs4921799  | 8  | 17507964  | NCI            | G | 0.828 | 0.90 | (0.83-0.98) | 1.32E-02 |          |
| rs4921799  | 8  | 17507964  | Nanjing_Scan   | G | 0.839 | 1.16 | (0.83-1.62) | 3.86E-01 |          |
| rs4921799  | 8  | 17507964  | Japan610       | G | 0.761 | 0.85 | (0.64-1.11) | 2.29E-01 |          |
| rs4921799  | 8  | 17507964  | JapanOmniEx    | G | 0.797 | 0.78 | (0.66-0.91) | 2.07E-03 |          |
| rs4921799  | 8  | 17507964  | Jinan          | G | 0.823 | 1.04 | (0.89-1.20) | 6.42E-01 |          |
| rs4921799  | 8  | 17507964  | Taiwan         | G | 0.845 | 0.74 | (0.54-1.01) | 5.92E-02 |          |
| rs4921799  | 8  | 17507964  | Beijing        | G | 0.842 | 1.07 | (0.80-1.42) | 6.56E-01 |          |
| rs4921799  | 8  | 17507964  | Nanjing_TaqMan | G | 0.853 | 0.80 | (0.63-1.03) | 7.77E-02 |          |
| rs4921799  | 8  | 17507964  | Tianjin        | G | 0.900 | 0.67 | (0.48-0.95) | 2.20E-02 |          |
| rs4921799  | 8  | 17507964  | Shenyang       | G | 0.860 | 0.79 | (0.62-1.03) | 7.63E-02 |          |
| rs4921799  | 8  | 17507964  | Shanghai       | G | 0.811 | 1.36 | (1.04-1.78) | 2.29E-02 |          |
| rs4921799  | 8  | 17507964  | CGR            | G | 0.805 | 0.76 | (0.46-1.24) | 2.64E-01 |          |
| rs4921799  | 8  | 17507964  | Wuhan          | G | 0.870 | 0.98 | (0.69-1.39) | 9.14E-01 |          |
| rs4921799  | 8  | 17507964  | Japan_NCCI     | G | 0.779 | 0.74 | (0.51-1.08) | 1.23E-01 |          |
| rs4921799  | 8  | 17507964  | Japan_NCCH     | G | 0.785 | 0.97 | (0.73-1.28) | 8.10E-01 |          |
| rs4921799  | 8  | 17507964  | Japan_BBJ_NCCH | C | 0.771 | 0.99 | (0.84-1.17) | 8.90E-01 |          |
| rs4921799  | 8  | 17507964  | Combined       |   |       | 0.91 | (0.87-0.96) | 2.51E-04 | 1.80E-02 |

|            |    |           |                |   |       |      |             |          |          |
|------------|----|-----------|----------------|---|-------|------|-------------|----------|----------|
| rs76677882 | 4  | 44187929  | NCI            | T | 0.053 | 1.38 | (1.18-1.61) | 4.94E-05 |          |
| rs76677882 | 4  | 44187929  | Nanjing_Scan   | T | 0.068 | 0.80 | (0.48-1.33) | 3.84E-01 |          |
| rs76677882 | 4  | 44187929  | Japan610       | T | 0.039 | 1.81 | (0.81-4.03) | 1.47E-01 |          |
| rs76677882 | 4  | 44187929  | JapanOmniEx    | T | 0.035 | 1.95 | (1.23-3.09) | 4.79E-03 |          |
| rs76677882 | 4  | 44187929  | Jinan          | A | 0.062 | 0.97 | (0.73-1.28) | 8.13E-01 |          |
| rs76677882 | 4  | 44187929  | Taiwan         | A | 0.085 | 1.06 | (0.72-1.58) | 7.60E-01 |          |
| rs76677882 | 4  | 44187929  | Beijing        | A | 0.079 | 0.86 | (0.58-1.29) | 4.74E-01 |          |
| rs76677882 | 4  | 44187929  | Nanjing_TaqMan | A | 0.082 | 1.02 | (0.72-1.43) | 9.13E-01 |          |
| rs76677882 | 4  | 44187929  | Tianjin        | A | 0.061 | 1.49 | (0.97-2.29) | 6.84E-02 |          |
| rs76677882 | 4  | 44187929  | Shenyang       | A | 0.072 | 1.23 | (0.91-1.67) | 1.73E-01 |          |
| rs76677882 | 4  | 44187929  | Shanghai       | A | 0.066 | 1.22 | (0.75-2.00) | 4.27E-01 |          |
| rs76677882 | 4  | 44187929  | CGR            | A | 0.042 | 0.48 | (0.13-1.75) | 2.56E-01 |          |
| rs76677882 | 4  | 44187929  | Japan_NCCI     | T | 0.031 | 1.04 | (0.41-2.61) | 9.37E-01 |          |
| rs76677882 | 4  | 44187929  | Japan_NCCH     | T | 0.031 | 1.11 | (0.57-2.16) | 7.60E-01 |          |
| rs76677882 | 4  | 44187929  | Japan_BBJ_NCCH | T | 0.034 | 0.82 | (0.55-1.23) | 3.50E-01 |          |
| rs76677882 | 4  | 44187929  | Combined       |   |       | 1.18 | (1.08-1.30) | 3.59E-04 | 5.66E-02 |
| rs10854241 | 20 | 18175352  | NCI            | G | 0.222 | 1.14 | (1.05-1.23) | 1.27E-03 |          |
| rs10854241 | 20 | 18175352  | Nanjing_Scan   | G | 0.257 | 0.91 | (0.68-1.21) | 4.99E-01 |          |
| rs10854241 | 20 | 18175352  | Japan610       | G | 0.189 | 1.03 | (0.73-1.44) | 8.83E-01 |          |
| rs10854241 | 20 | 18175352  | JapanOmniEx    | G | 0.166 | 1.21 | (0.99-1.47) | 6.16E-02 |          |
| rs10854241 | 20 | 18175352  | Jinan          | G | 0.185 | 1.05 | (0.90-1.23) | 5.26E-01 |          |
| rs10854241 | 20 | 18175352  | Taiwan         | G | 0.375 | 0.33 | (0.13-0.85) | 1.63E-02 |          |
| rs10854241 | 20 | 18175352  | Nanjing_TaqMan | G | 0.202 | 0.88 | (0.69-1.11) | 2.79E-01 |          |
| rs10854241 | 20 | 18175352  | CGR            | G | 0.145 | 0.71 | (0.38-1.34) | 2.92E-01 |          |
| rs10854241 | 20 | 18175352  | Combined       |   |       | 1.09 | (1.02-1.16) | 7.75E-03 | 3.43E-02 |
| rs4621673  | 7  | 155209171 | NCI            | T | 0.435 | 0.86 | (0.81-0.92) | 9.48E-06 |          |
| rs4621673  | 7  | 155209171 | Nanjing_Scan   | T | 0.409 | 1.06 | (0.83-1.35) | 6.46E-01 |          |

|           |    |           |                |   |       |      |             |          |          |
|-----------|----|-----------|----------------|---|-------|------|-------------|----------|----------|
| rs4621673 | 7  | 155209171 | Japan610       | T | 0.352 | 0.72 | (0.57-0.92) | 9.23E-03 |          |
| rs4621673 | 7  | 155209171 | JapanOmniEx    | T | 0.334 | 0.93 | (0.81-1.07) | 3.26E-01 |          |
| rs4621673 | 7  | 155209171 | Jinan          | T | 0.425 | 1.02 | (0.90-1.17) | 7.24E-01 |          |
| rs4621673 | 7  | 155209171 | Taiwan         | T | 0.422 | 1.11 | (0.88-1.40) | 3.82E-01 |          |
| rs4621673 | 7  | 155209171 | Beijing        | T | 0.397 | 1.21 | (0.98-1.49) | 6.92E-02 |          |
| rs4621673 | 7  | 155209171 | Nanjing_TaqMan | T | 0.408 | 1.16 | (0.96-1.40) | 1.16E-01 |          |
| rs4621673 | 7  | 155209171 | Tianjin        | T | 0.417 | 1.09 | (0.86-1.38) | 4.70E-01 |          |
| rs4621673 | 7  | 155209171 | Shenyang       | T | 0.416 | 0.98 | (0.82-1.18) | 8.54E-01 |          |
| rs4621673 | 7  | 155209171 | Shanghai       | T | 0.420 | 0.95 | (0.73-1.23) | 6.81E-01 |          |
| rs4621673 | 7  | 155209171 | CGR            | T | 0.354 | 0.84 | (0.54-1.31) | 4.51E-01 |          |
| rs4621673 | 7  | 155209171 | Japan_NCCI     | T | 0.308 | 1.01 | (0.71-1.42) | 9.77E-01 |          |
| rs4621673 | 7  | 155209171 | Japan_NCCH     | T | 0.298 | 1.37 | (1.06-1.78) | 1.70E-02 |          |
| rs4621673 | 7  | 155209171 | Japan_BBJ_NCCH | T | 0.336 | 0.90 | (0.77-1.05) | 1.60E-01 |          |
| rs4621673 | 7  | 155209171 | Combined       |   |       | 0.95 | (0.91-0.99) | 1.04E-02 | 8.84E-04 |
| rs1800378 | 12 | 6172202   | NCI            | C | 0.721 | 0.89 | (0.83-0.95) | 7.06E-04 |          |
| rs1800378 | 12 | 6172202   | Nanjing_Scan   | C | 0.643 | 1.25 | (0.92-1.70) | 1.46E-01 |          |
| rs1800378 | 12 | 6172202   | Japan610       | C | 0.659 | 0.80 | (0.63-1.02) | 7.63E-02 |          |
| rs1800378 | 12 | 6172202   | JapanOmniEx    | C | 0.652 | 0.88 | (0.76-1.01) | 6.99E-02 |          |
| rs1800378 | 12 | 6172202   | Jinan          | C | 0.702 | 1.09 | (0.95-1.26) | 2.23E-01 |          |
| rs1800378 | 12 | 6172202   | Taiwan         | C | 0.739 | 0.81 | (0.63-1.04) | 1.03E-01 |          |
| rs1800378 | 12 | 6172202   | Beijing        | C | 0.707 | 0.99 | (0.79-1.24) | 9.40E-01 |          |
| rs1800378 | 12 | 6172202   | Nanjing_TaqMan | C | 0.730 | 1.06 | (0.86-1.30) | 6.07E-01 |          |
| rs1800378 | 12 | 6172202   | Tianjin        | C | 0.710 | 1.04 | (0.82-1.33) | 7.31E-01 |          |
| rs1800378 | 12 | 6172202   | Shenyang       | C | 0.729 | 0.94 | (0.76-1.14) | 5.17E-01 |          |
| rs1800378 | 12 | 6172202   | Shanghai       | C | 0.726 | 0.88 | (0.66-1.17) | 3.68E-01 |          |
| rs1800378 | 12 | 6172202   | CGR            | C | 0.638 | 1.01 | (0.67-1.51) | 9.78E-01 |          |
| rs1800378 | 12 | 6172202   | Japan_NCCI     | C | 0.601 | 1.22 | (0.87-1.71) | 2.59E-01 |          |
| rs1800378 | 12 | 6172202   | Japan_NCCH     | C | 0.617 | 1.16 | (0.90-1.48) | 2.50E-01 |          |
| rs1800378 | 12 | 6172202   | Japan_BBJ_NCCH | G | 0.615 | 1.05 | (0.91-1.21) | 5.50E-01 |          |

|            |    |          |                |   |       |             |              |          |
|------------|----|----------|----------------|---|-------|-------------|--------------|----------|
| rs1800378  | 12 | 6172202  | Combined       |   | 0.95  | (0.91-0.99) | 2.33E-02     | 5.18E-02 |
| rs911499   | 11 | 34240897 | NCI            | G | 0.867 | 0.82        | (0.75-0.90)  | 3.07E-05 |
| rs911499   | 11 | 34240897 | Nanjing_Scan   | G | 0.844 | 0.97        | (0.71-1.34)  | 8.74E-01 |
| rs911499   | 11 | 34240897 | Japan610       | G | 0.910 | 0.93        | (0.61-1.43)  | 7.48E-01 |
| rs911499   | 11 | 34240897 | JapanOmniEx    | G | 0.907 | 0.73        | (0.59-0.92)  | 6.07E-03 |
| rs911499   | 11 | 34240897 | Jinan          | G | 0.737 | 1.13        | (0.99-1.29)  | 6.22E-02 |
| rs911499   | 11 | 34240897 | Taiwan         | G | 0.845 | 1.07        | (0.77-1.48)  | 6.89E-01 |
| rs911499   | 11 | 34240897 | Nanjing_TaqMan | G | 0.845 | 1.27        | (0.97-1.65)  | 8.29E-02 |
| rs911499   | 11 | 34240897 | Tianjin        | G | 0.836 | 1.09        | (0.80-1.49)  | 5.88E-01 |
| rs911499   | 11 | 34240897 | Shenyang       | G | 0.856 | 0.99        | (0.76-1.29)  | 9.32E-01 |
| rs911499   | 11 | 34240897 | Shanghai       | G | 0.837 | 1.07        | (0.76-1.52)  | 7.03E-01 |
| rs911499   | 11 | 34240897 | CGR            | G | 0.869 | 3.82        | (1.43-10.19) | 4.67E-03 |
| rs911499   | 11 | 34240897 | Japan_NCCI     | G | 0.925 | 0.47        | (0.27-0.80)  | 5.60E-03 |
| rs911499   | 11 | 34240897 | Japan_NCCH     | G | 0.897 | 1.12        | (0.73-1.73)  | 6.10E-01 |
| rs911499   | 11 | 34240897 | Japan_BBJ_NCCH | C | 0.898 | 0.98        | (0.78-1.23)  | 8.70E-01 |
| rs911499   | 11 | 34240897 | Combined       |   | 0.94  | (0.89-1.00) | 3.38E-02     | 4.88E-05 |
| rs78662068 | 4  | 44214815 | NCI            | C | 0.053 | 1.35        | (1.16-1.58)  | 9.88E-05 |
| rs78662068 | 4  | 44214815 | Nanjing_Scan   | C | 0.069 | 0.76        | (0.46-1.26)  | 2.85E-01 |
| rs78662068 | 4  | 44214815 | Japan610       | C | 0.038 | 1.71        | (0.79-3.74)  | 1.76E-01 |
| rs78662068 | 4  | 44214815 | JapanOmniEx    | C | 0.034 | 2.02        | (1.29-3.18)  | 2.19E-03 |
| rs78662068 | 4  | 44214815 | Jinan          | G | 0.148 | 0.86        | (0.75-1.00)  | 5.40E-02 |
| rs78662068 | 4  | 44214815 | Taiwan         | G | 0.081 | 1.07        | (0.71-1.60)  | 7.55E-01 |
| rs78662068 | 4  | 44214815 | Beijing        | G | 0.064 | 0.88        | (0.57-1.35)  | 5.48E-01 |
| rs78662068 | 4  | 44214815 | CGR            | G | 0.038 | 0.56        | (0.15-2.05)  | 3.76E-01 |
| rs78662068 | 4  | 44214815 | Japan_NCCI     | G | 0.028 | 1.12        | (0.44-2.86)  | 8.09E-01 |
| rs78662068 | 4  | 44214815 | Japan_NCCH     | G | 0.032 | 1.02        | (0.51-2.00)  | 9.70E-01 |
| rs78662068 | 4  | 44214815 | Japan_BBJ_NCCH | G | 0.033 | 0.74        | (0.49-1.12)  | 1.60E-01 |
| rs78662068 | 4  | 44214815 | Combined       |   | 1.06  | (0.97-1.17) | 1.82E-01     | 3.01E-04 |

\*EA, Effect Allele; \*\*EAF; Effect Allele Frequency in controls.
